# Supplementary material for: Noninvasive Assessment of Antenatal Hydronephrosis in Mice Reveals a Critical Role for Robo2 in Maintaining Anti-Reflux Mechanism
Source: PLOS journal article supplement (doi:10.1371/journal.pone.0024763), 2011-09-20
Supplement: S3 (10.1371/journal.pone.0024763.s003) [file journal.pone.0024763.s003]

**Figure S3**

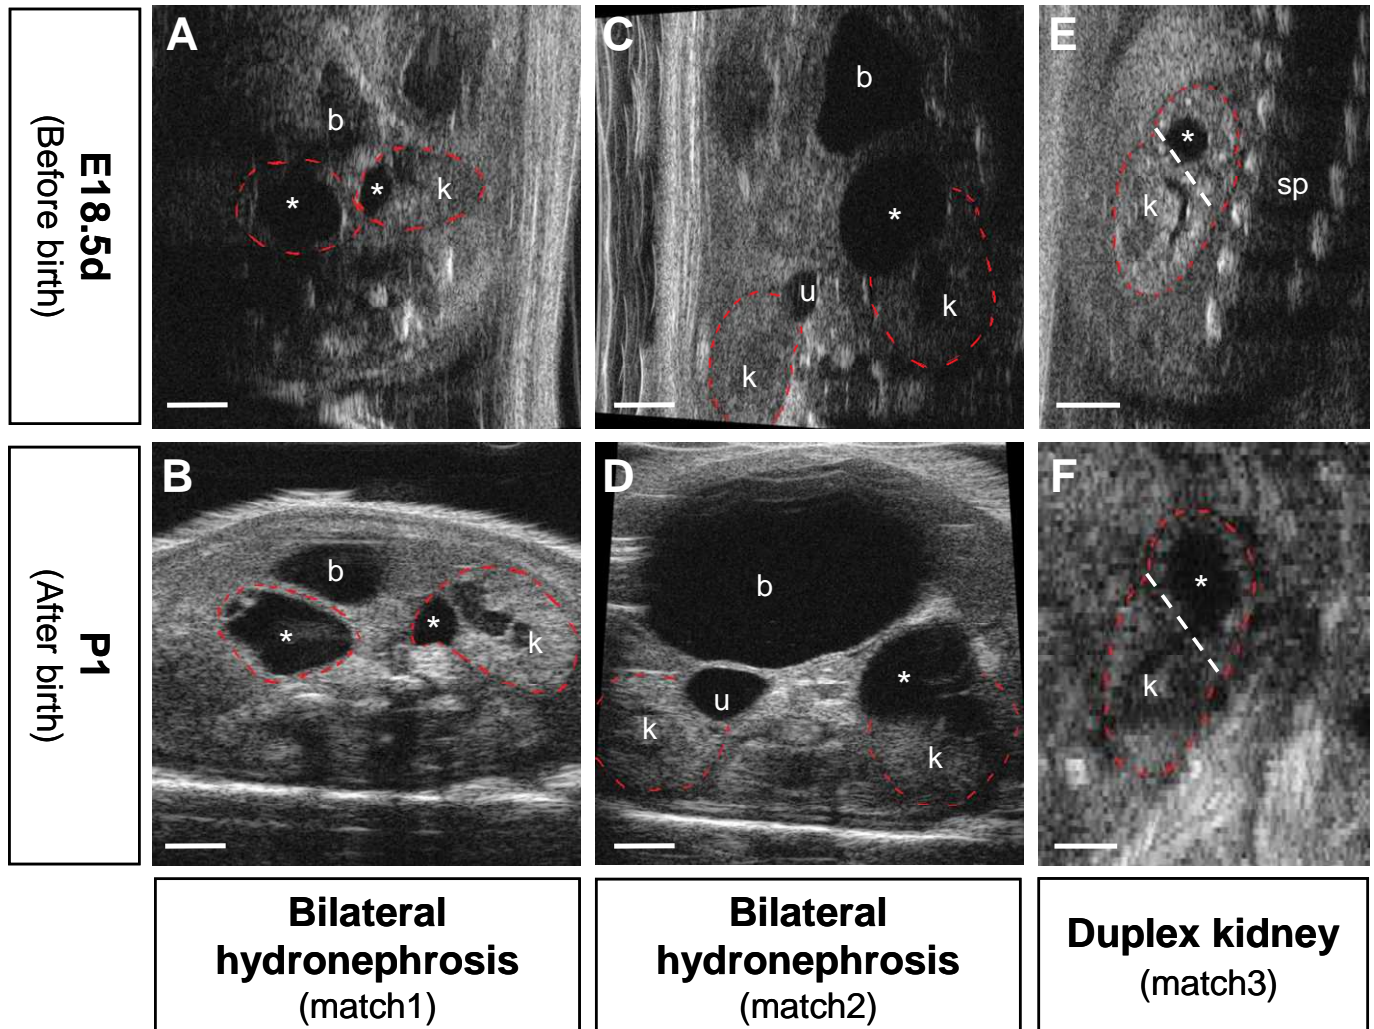

**Figure S3.** Antenatal congenital urinary tract defects in *Robo2* mutant mice can be monitored and followed from prenatal to postnatal stages. Upper panels (**A,C,E**) showing ultrasonographic images from E18.5 *Robo2* embryos before birth. Lower panels (**B,D,F**) showing ultrasonographic images from corresponding postnatal day-1 (P1) *Robo2* mice after birth. Left column (**A,B**) depicting follow-up and match of bilateral hydronephrosis (asterisks) phenotype in a *Robo2* mosaic mutant from prenatal to postnatal stages (Match 1). Middle column (**C,D**) depicting follow-up and match of left hydroureter (u) and right hydronephrosis (asterisks) phenotype in a second *Robo2* mosaic mutant from prenatal to postnatal stages (Match 2). Right column (**E,F**) depicting follow-up and match of a duplex kidney phenotype with upper pole hydronephrosis (asterisk) in a third *Robo2* mosaic mutant from prenatal to postnatal stages (Match 3); upper and lower pole of duplex kidney were separated by an artificial white dot line. Scale bars, 1.0 mm. Abbreviation: b, urinary bladder; k, kidney; sp, spine; u, ureter.
