# Supplementary material for: Noninvasive Assessment of Antenatal Hydronephrosis in Mice Reveals a Critical Role for Robo2 in Maintaining Anti-Reflux Mechanism
Source: PLOS journal article supplement (doi:10.1371/journal.pone.0024763), 2011-09-20
Supplement: S5 (10.1371/journal.pone.0024763.s005) [file journal.pone.0024763.s005]

**Figure S5**

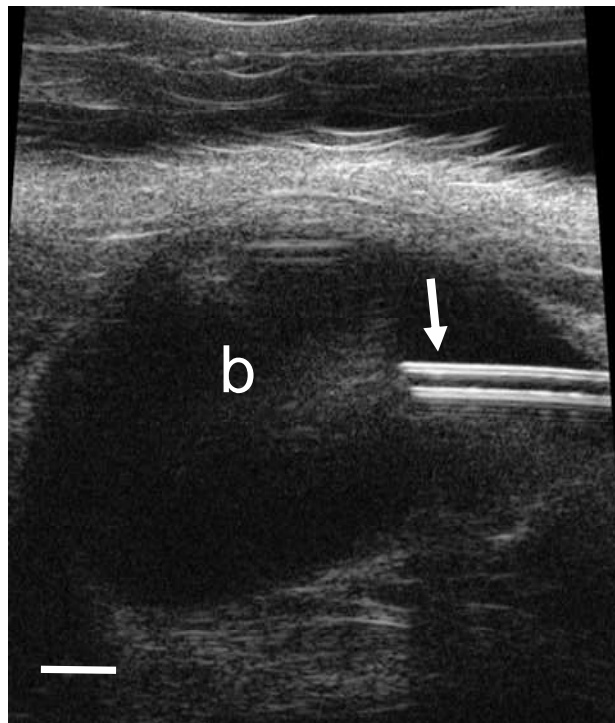

### **Mouse urethral catheterization**

**Figure S5.** Urethral catheter inside a mouse bladder can be detected by urosonography. Urethral catheter (white arrow) was visible inside a 6-week old female mouse bladder (b) under B-mode ultrasound scan. Scale bars, 1.0 mm.
