# Supplementary material for: Noninvasive Assessment of Antenatal Hydronephrosis in Mice Reveals a Critical Role for Robo2 in Maintaining Anti-Reflux Mechanism
Source: PLOS journal article supplement (doi:10.1371/journal.pone.0024763), 2011-09-20
Supplement: S6 (10.1371/journal.pone.0024763.s006) [file journal.pone.0024763.s006]

**Figure S6**

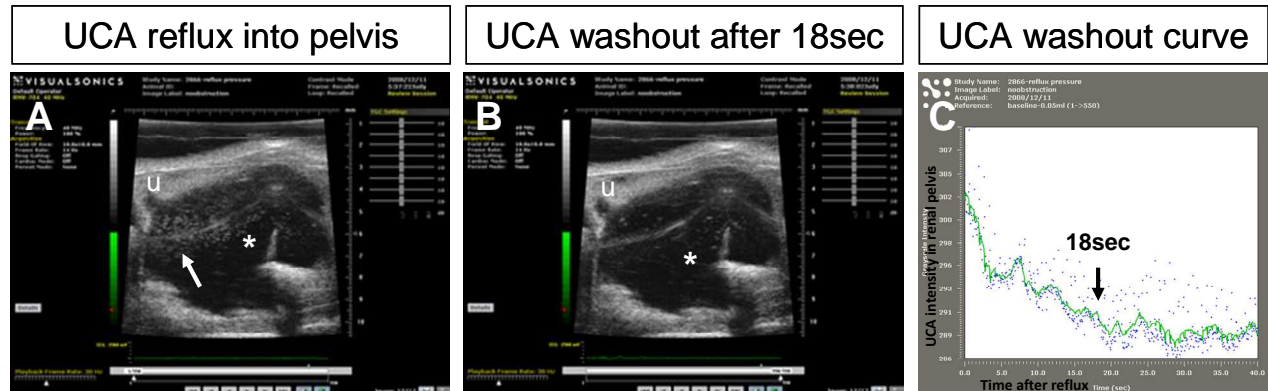

**Figure S6.** Microbubble ultrasound contrast agents (UCA) were washed out from renal pelvis shortly after reflux in *Robo2* mutant mice. **(A)** Ultrasound contrast agents (UCA, arrow) refluxed into the renal pelvis (asterisk) through the ureter (u) after bladder infusion. **(B)** UCA disappeared from the renal pelvis (asterisk) through the ureter (u) 18 second after reflux, suggesting no urinary tract obstruction. **(C)** UCA washout curve showing microbubble flowed out of the renal pelvis 18 second after it appeared.
