# Supplementary material for: Noninvasive Assessment of Antenatal Hydronephrosis in Mice Reveals a Critical Role for Robo2 in Maintaining Anti-Reflux Mechanism
Source: PLOS journal article supplement (doi:10.1371/journal.pone.0024763), 2011-09-20
Supplement: S10 (10.1371/journal.pone.0024763.s010) [file journal.pone.0024763.s010]

**Table S2**

Sensitivity and specificity of hydronephrosis detection in *Robo2* newborn mice by micro-ultrasonography

|                              |                                        | Histology<br>(standard)      |                       |
|------------------------------|----------------------------------------|------------------------------|-----------------------|
|                              |                                        | Hydronephrosis<br>(Positive) | Normal<br>(Negative)  |
| Ultrasound<br>(test outcome) | Hydronephrosis<br>(Positive)           | 21<br>(true positive)        | 0<br>(false positive) |
|                              | Normal &<br>Not detected<br>(Negative) | 0<br>(false negative)        | 25<br>(true negative) |

46 newborn mice from *Robo2* heterozygous mating were subjected to ultrasound scanning to detect postnatal hydronephrosis. The newborn mice were then dissected and analyzed by histology.
